# Supplementary material for: Co-Inoculation of Plant-Growth-Promoting Bacteria Modulates Physiological and Biochemical Responses of Perennial Ryegrass to Water Deficit
Source: MDPI journal article supplement (doi:10.3390/plants11192543), 2022-09-28
Supplement: s1 [file s1]

*Supplementary material*

**Co-inoculation of plant growth-promoting bacteria  
modulate physiological and biochemical responses of  
perennial ryegrass to water deficit**

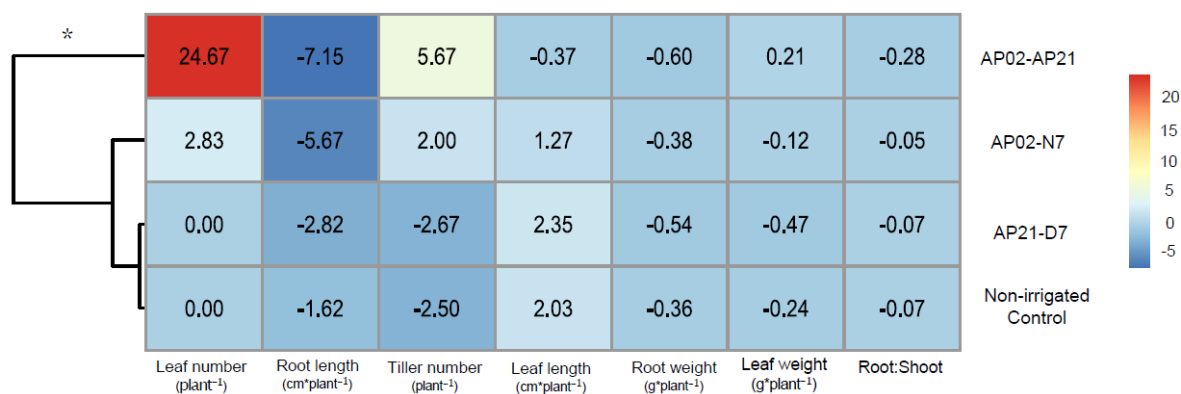

**Figure S1.** Heatmap and multiple comparison test for the morphological parameters of perennial ryegrass. The variables were analyzed via gDGC multiple comparison of means with significance level  $\alpha = 0.05$  and ward linkage (asterisk shows a significant difference) and validated with a Hotelling test with the Bonferroni correction ( $p > 0.05$ ).
